# Supplementary material
Source: MDPI journal article supplement (https://www.mdpi.com/2039-7283/12/4/58)
Supplement: s1 [file s1]

## Clinician Survey: *Quality Indicators for Clinical Consultations*

|                      |                                                                                                                                                            |
|----------------------|------------------------------------------------------------------------------------------------------------------------------------------------------------|
| Consultation date    | __ / __ / ____                                                                                                                                             |
| Type of consultation | <input type="checkbox"/> Face to face <input type="checkbox"/> Telephone                                                                                   |
| Patient MRN          |                                                                                                                                                            |
| Patient age          |                                                                                                                                                            |
| Patient sex          |                                                                                                                                                            |
| Consultation type    | <input type="checkbox"/> Initial appointment <input type="checkbox"/> Review                                                                               |
| Consultation outcome | <input type="checkbox"/> Further investigations <input type="checkbox"/> Treatment <input type="checkbox"/> Monitoring <input type="checkbox"/> Discharged |

|                                                                                                                                                                     |                              |                             |                                                                                                                                                                                                                             |
|---------------------------------------------------------------------------------------------------------------------------------------------------------------------|------------------------------|-----------------------------|-----------------------------------------------------------------------------------------------------------------------------------------------------------------------------------------------------------------------------|
| Did the patient know why they were attending the consultation?                                                                                                      | <input type="checkbox"/> Yes | <input type="checkbox"/> No |                                                                                                                                                                                                                             |
| Did you have the opportunity to review the case before the consultation?                                                                                            | <input type="checkbox"/> Yes | <input type="checkbox"/> No |                                                                                                                                                                                                                             |
| Did you ask and document the patient's occupation and/or interests?                                                                                                 | <input type="checkbox"/> Yes | <input type="checkbox"/> No |                                                                                                                                                                                                                             |
| Did the consultation time feel adequate and unhurried?                                                                                                              | <input type="checkbox"/> Yes | <input type="checkbox"/> No |                                                                                                                                                                                                                             |
| Was the consultation free of interruptions? (eg: being called by a colleague during the consultation)                                                               | <input type="checkbox"/> Yes | <input type="checkbox"/> No | If no, please specify:                                                                                                                                                                                                      |
| Was the consultation free of distractions? (eg: nearby building works)                                                                                              | <input type="checkbox"/> Yes | <input type="checkbox"/> No | If no, please specify:                                                                                                                                                                                                      |
| Did you have all the information needed to conduct the consultation?                                                                                                | <input type="checkbox"/> Yes | <input type="checkbox"/> No | If no, please specify:<br><input type="checkbox"/> Lab results <input type="checkbox"/> Imaging results<br><input type="checkbox"/> Information from GP or specialists<br><input type="checkbox"/> Other:<br>_____<br>_____ |
| Were confidentiality and dignity maintained throughout the consultation? (eg: was the telephone consultation able to be conducted in a confidential setting?)       | <input type="checkbox"/> Yes | <input type="checkbox"/> No | If no, please specify:                                                                                                                                                                                                      |
| Were breaks taken as needed throughout the clinic and, if an afternoon clinic, did you have a lunch break?                                                          | <input type="checkbox"/> Yes | <input type="checkbox"/> No |                                                                                                                                                                                                                             |
| Was the patient's friend or relative invited to participate in the consultation? (eg: via speaker phone or sitting next to the patient throughout the consultation) | <input type="checkbox"/> Yes | <input type="checkbox"/> No |                                                                                                                                                                                                                             |
| Overall, were you satisfied with the consultation?                                                                                                                  | <input type="checkbox"/> Yes | <input type="checkbox"/> No |                                                                                                                                                                                                                             |
| Any further comments?                                                                                                                                               |                              |                             |                                                                                                                                                                                                                             |

## Patient Survey: *Quality Indicators for Clinical Consultations*

|                      |                                                                                                                                                            |
|----------------------|------------------------------------------------------------------------------------------------------------------------------------------------------------|
| Consultation date    | __ / __ / ____                                                                                                                                             |
| Type of consultation | <input type="checkbox"/> Face to face <input type="checkbox"/> Telephone                                                                                   |
| Patient MRN          |                                                                                                                                                            |
| Patient age          |                                                                                                                                                            |
| Patient sex          | <input type="checkbox"/> Male <input type="checkbox"/> Female                                                                                              |
| Consultation type    | <input type="checkbox"/> Initial appointment <input type="checkbox"/> Review                                                                               |
| Consultation outcome | <input type="checkbox"/> Further investigations <input type="checkbox"/> Treatment <input type="checkbox"/> Monitoring <input type="checkbox"/> Discharged |

|                                                                                                                                                               |                              |                             |                                                                                                                                                                                                                             |
|---------------------------------------------------------------------------------------------------------------------------------------------------------------|------------------------------|-----------------------------|-----------------------------------------------------------------------------------------------------------------------------------------------------------------------------------------------------------------------------|
| Did you know why you were attending the consultation?                                                                                                         | <input type="checkbox"/> Yes | <input type="checkbox"/> No |                                                                                                                                                                                                                             |
| Did the clinician know the details of your case?                                                                                                              | <input type="checkbox"/> Yes | <input type="checkbox"/> No |                                                                                                                                                                                                                             |
| Did the clinician ask about your occupation and/or interests?                                                                                                 | <input type="checkbox"/> Yes | <input type="checkbox"/> No |                                                                                                                                                                                                                             |
| Did the consultation time feel adequate and unhurried?                                                                                                        | <input type="checkbox"/> Yes | <input type="checkbox"/> No |                                                                                                                                                                                                                             |
| Was the consultation free of interruptions? (eg: you or the clinician received other calls during the consultation)                                           | <input type="checkbox"/> Yes | <input type="checkbox"/> No | If no, please specify:                                                                                                                                                                                                      |
| Was the consultation free of distractions? (eg: nearby building works)                                                                                        | <input type="checkbox"/> Yes | <input type="checkbox"/> No | If no, please specify:                                                                                                                                                                                                      |
| Did the clinician have the information needed to conduct the consultation?                                                                                    | <input type="checkbox"/> Yes | <input type="checkbox"/> No | If no, please specify:<br><input type="checkbox"/> Lab results <input type="checkbox"/> Imaging results<br><input type="checkbox"/> Information from GP or specialists<br><input type="checkbox"/> Other:<br>_____<br>_____ |
| Were confidentiality and dignity maintained throughout the consultation? (eg: was the telephone consultation able to be conducted in a confidential setting?) | <input type="checkbox"/> Yes | <input type="checkbox"/> No | If no, please specify:                                                                                                                                                                                                      |
| Was your friend or relative invited to participate in the consultation? (eg: via speaker phone or sitting next to you throughout the consultation)            | <input type="checkbox"/> Yes | <input type="checkbox"/> No | If no, would you have liked this to have occurred? <input type="checkbox"/> Yes <input type="checkbox"/> No                                                                                                                 |
| Overall, were you satisfied with the consultation?                                                                                                            | <input type="checkbox"/> Yes | <input type="checkbox"/> No |                                                                                                                                                                                                                             |
| After the pandemic ends, would you like the option of having your consultation via the telephone?                                                             | <input type="checkbox"/> Yes | <input type="checkbox"/> No |                                                                                                                                                                                                                             |
| Any further comments?                                                                                                                                         | <input type="checkbox"/> Yes | <input type="checkbox"/> No |                                                                                                                                                                                                                             |
